# Supplementary material for: Association between Vitamin D Deficiency and Clinical Parameters in Men and Women Aged 50 Years or Older: A Cross-Sectional Cohort Study
Source: MDPI journal article supplement (doi:10.3390/nu15133043), 2023-07-05
Supplement: s1 [file s1]

**Supplementary TableS1.** Multiple linear regression analyses for 25(OH)D as outcome in women

| Variable      | Model 1        |                 | Model2         |                 | Model 3        |                 |
|---------------|----------------|-----------------|----------------|-----------------|----------------|-----------------|
|               | $\beta$ (SE)   | <i>p</i> -Value | $\beta$ (SE)   | <i>p</i> -Value | $\beta$ (SE)   | <i>p</i> -Value |
| HbA1c         | -3.267 (1.246) | 0.010           | -2.777 (1.240) | 0.027           | -2.672 (1.166) | 0.024           |
| BMI           | -0.877 (0.270) | 0.002           | -0.772 (0.270) | 0.005           | -0.611 (0.260) | 0.020           |
| TNF- $\alpha$ | -1.394 (0.601) | 0.022           | -1.382 (0.582) | 0.019           | -1.188 (0.552) | 0.033           |
| IL-6          | -0.322 (0.672) | 0.633           | -0.175 (0.662) | 0.792           | -0.434 (0.623) | 0.487           |
| IL-1 $\beta$  | -0.191 (0.803) | 0.813           | 0.083 (0.793)  | 0.917           | 0.374 (0.769)  | 0.628           |
| HGS           | 0.252 (0.271)  | 0.354           | 0.226 (0.268)  | 0.402           | 0.138 (0.253)  | 0.585           |
| CST           | 0.225 (0.367)  | 0.542           | 0.067 (0.363)  | 0.853           | -0.129 (0.352) | 0.714           |

Data are expressed as the Beta-coefficient ( $\beta$ ) and standard error (SE). BMI: body mass index; HGS: handgrip strength; CST: chair stand test. Model 1: adjusted for age. Model 2: adjusted for age, smoking, alcohol drinking, and exercise. Model 3: adjusted for age, smoking, alcohol drinking, exercise, eGFR, diabetes, hypertension, and vitamin D replacement.

**Supplementary TableS2.** Correlations between 25(OH)D levels and clinical parameters in men and women

| Variables                | 25(OH)D  |                 |          |                 |
|--------------------------|----------|-----------------|----------|-----------------|
|                          | Men      |                 | Women    |                 |
|                          | <i>r</i> | <i>p</i> -Value | <i>r</i> | <i>p</i> -Value |
| Age (years)              | -0.029   | 0.623           | -0.021   | 0.816           |
| BMI (kg/m <sup>2</sup> ) | -0.014   | 0.815           | -0.282   | 0.001           |
| HbA1c (%)                | -0.087   | 0.141           | -0.231   | 0.010           |
| TNF- $\alpha$ (pg/mL)    | -0.035   | 0.551           | -0.206   | 0.021           |
| IL-6 (pg/mL)             | 0.083    | 0.158           | -0.044   | 0.625           |
| IL-1 $\beta$ (pg/mL)     | 0.010    | 0.864           | -0.020   | 0.824           |
| HGS (kg)                 | 0.069    | 0.244           | 0.086    | 0.342           |
| CST (sec)                | 0.106    | 0.076           | 0.058    | 0.542           |

Values are Pearson's correlation coefficients. BMI: body mass index; HGS: handgrip strength; CST: chair stand test.
